# Supplementary material for: Knowledge, attitude and practices associated with COVID-19 among health care workers: A cross-sectional study in India.
Source: Research Square preprint supplement (doi:10.21203/rs.3.rs-87442/v1), 2020-10-07
Supplement: Supplementary file 1 [file 00e84b97ab3abe52a1e5eeb6.docx]

**Knowledge, attitude, and practices associated with COVID-19 among health care workers: A cross-sectional study in India.**

**Questionnaire Part 1: Invitation to participate in research**

The COVID-19 pandemic is the latest threat to humanity, in terms of lives lost and economic break down. As India battles bravely against this pandemic, medical professionals need to maintain high morale and knowledge about the pandemic if we are to win. In this short survey we aimed to find out the KAP [Knowledge, Attitude and Practises] among health care personnel involved in COVID -19 management in healthcare institutions.

We kindly invite you to fill out this questionnaire, which will be the main pillar in a scientific research entitled "**Knowledge, attitude, and practises associated with COVID-19 among health care workers : A cross-sectional study in India**". The study aims to investigate the current level of knowledge, attitude, and practises associated with COVID-19 among health care personnel involved in the management of patients with COVID-19 in India. Your participation in this questionnaire is optional and all the information collected will be treated in strict confidence. It will take only a few minutes, we sincerely appreciate your time and efforts spent in completing this survey.

**Declaration**

I have gone through the details of the study and I am well informed about the purpose of this survey. I understand that all of my responses would be maintained strictly confidential, and my participation in this study is purely voluntary. I hereby give my consent to participate in this study.

- - Agree
  - Disagree

**Part 1: Elements for the demographic information about the participants**

1. Age group:
   - 21 – 30 years
   - 31 – 40 years
   - 41 – 50 years
   - 51 – 60 years
   - 61 – 70 years
2. Gender (Sex):
   - Male
   - Female
3. Current marital status:
   - Married
   - Single
4. Residential settlement
   - Urban area
   - Rural area
5. Highest educational qualification:
   - CRRI: Compulsory Rotatory Residential Intern
   - Diploma
   - Bachelor or professional degree
   - Postgraduate study or training (master, residency, or fellowship)
6. Specialty or service you provide in your health care institution:
   - Medical
   - Surgical
   - Nursing
   - Pharmacists
   - Physical therapist
   - Respiratory therapist
   - Other paraclinical services
   - Laboratory services
   - Administrative
   - Other supportive services
7. Whether you have received any infection training?
   - Yes
   - No
8. The source of your knowledge about COVID is mainly through:
   - International Websites and Health organisations like CDC/WHO.
   - Ministry of Health/State guidelines.
   - News media channels
   - Social media[Whatsapp/Twitter/Facebook]

**Part 2: Items related to the main aim of the study**

1. **Please answer the following questions regarding your knowledge of COVID-19:**
2. COVID-19 is a contagious disease that is caused by:
   - Fungi
   - Bacteria
   - Virus
   - Parasite
   - I don’t know
3. The most common manifestation for the COVID-19 is:
   - Cough and fever
   - Stuffy and runny nose
   - Mild headache
   - Abdominal pain and diarrhea
   - I don’t know
4. The disease can easily spread through:
   - Food
   - Water
   - Close contact with animal
   - Respiratory droplets and close contact
   - I don’t know
5. What is the longest incubation period for COVID-19 before experiencing any symptoms?
   - 3 days
   - 5 days
   - 10 days
   - 14 days
   - I don’t know
6. Severe cases and death are more common among:
   - Young children (< 18 years)
   - Youth (19-30 years)
   - Older adults (31-60 years)
   - Elderly (>60 years)
   - I don’t know
7. Multiple proven curative treatment options are available now for COVID-19 all over the world:
   - True
   - False
   - I don’t know
8. Most COVID-19 cases are mild and can recover with no treatment:
   - True
   - False
   - I don’t know
9. We know that the pandemic will be over by summer, as the causative microbe is sensitive to high temperature and humidity:
   - True
   - False
   - I don’t know
10. Washing hands with soap and water is effective in eliminating the causative microbe.
    - True
    - False
    - I don’t know
11. **Attitude Questionaire: Do you agree or disagree with the following statements:**

**(Agree – Not Sure – Disagree)**

1. In my opinion, all people in the healthcare system and the community are part of this battle against COVID-19, and should be responsible about their role.
   - Agree
   - Disagree
   - Not sure
2. I believe that early detection of COVID-19 cases through mass testing will facilitate or accelerate the control of the COVID-19 pandemic.
   - Agree
   - Disagree
   - Not sure
3. I think people who got infected with COVID-19, including health care personnel, were infected due to negligence. (reversed scoring)
   - Agree
   - Disagree
   - Not sure
4. You have a feel of threat or fear when you become close or provide care to a confirmed or suspected COVID-19 patient. (reversed scoring)
   - Agree
   - Disagree
   - Not sure
5. I think COVID-19 is just a communicable disease which is being given undue importance. (reversed scoring)
   - Agree
   - Disagree
   - Not sure
6. I think restricting travels, locking cities, and quarantining all suspected cases are an exaggeration for the current situation. (reversed scoring)
   - Agree
   - Disagree
   - Not sure
7. The country’s efforts will succeed in the battle against COVID-19 pandemic.
   - Agree
   - Disagree
   - Not sure
8. I think when COVID-19 pandemic is over many benefits and good things will be seen.
   - Agree
   - Disagree
   - Not sure
9. **Practices Questionaire: Which of the following practices you can say that you are doing most or all of the time:**

**(Yes – No – Not Sure)**

1. If I or anyone close to me develop any COVID-19 symptoms, I will seek or recommend to others to seek medical attention.
   - Yes
   - No
   - Not sure
2. When I am putting on the personal protective equipment (PPE), I follow the following order: Suit – Mask – Goggles – Gloves.
   - Yes
   - No
   - Not sure
3. I am careful not to carry my mobile phone/pen, etc… inside the COVID-19 ward.
   - Yes
   - No
   - Not sure
4. I don’t go out unless it is necessary.
   - Yes
   - No
   - Not sure
5. When I finish my shift, I dispose the PPE and scrub thoroughly before entering home/quarters.
   - Yes
   - No
   - Not sure
6. I sanitise my hands with alchohol based solution before attending to each patient.
   - Yes
   - No
   - Not sure
7. After using my PPE, I dispose them in the appropriate colour coded bins.
   - Yes
   - No
   - Not sure
